# Supplementary material for: Unbiased Characterization of Anopheles Mosquito Blood Meals by Targeted High-Throughput Sequencing
Source: PubMed Central journal article supplement (PMC4786206; doi:10.1371/journal.pntd.0004512), 2016-03-10
Supplement: pntd.0004512.s010.pdf [file pntd.0004512.s010.pdf]

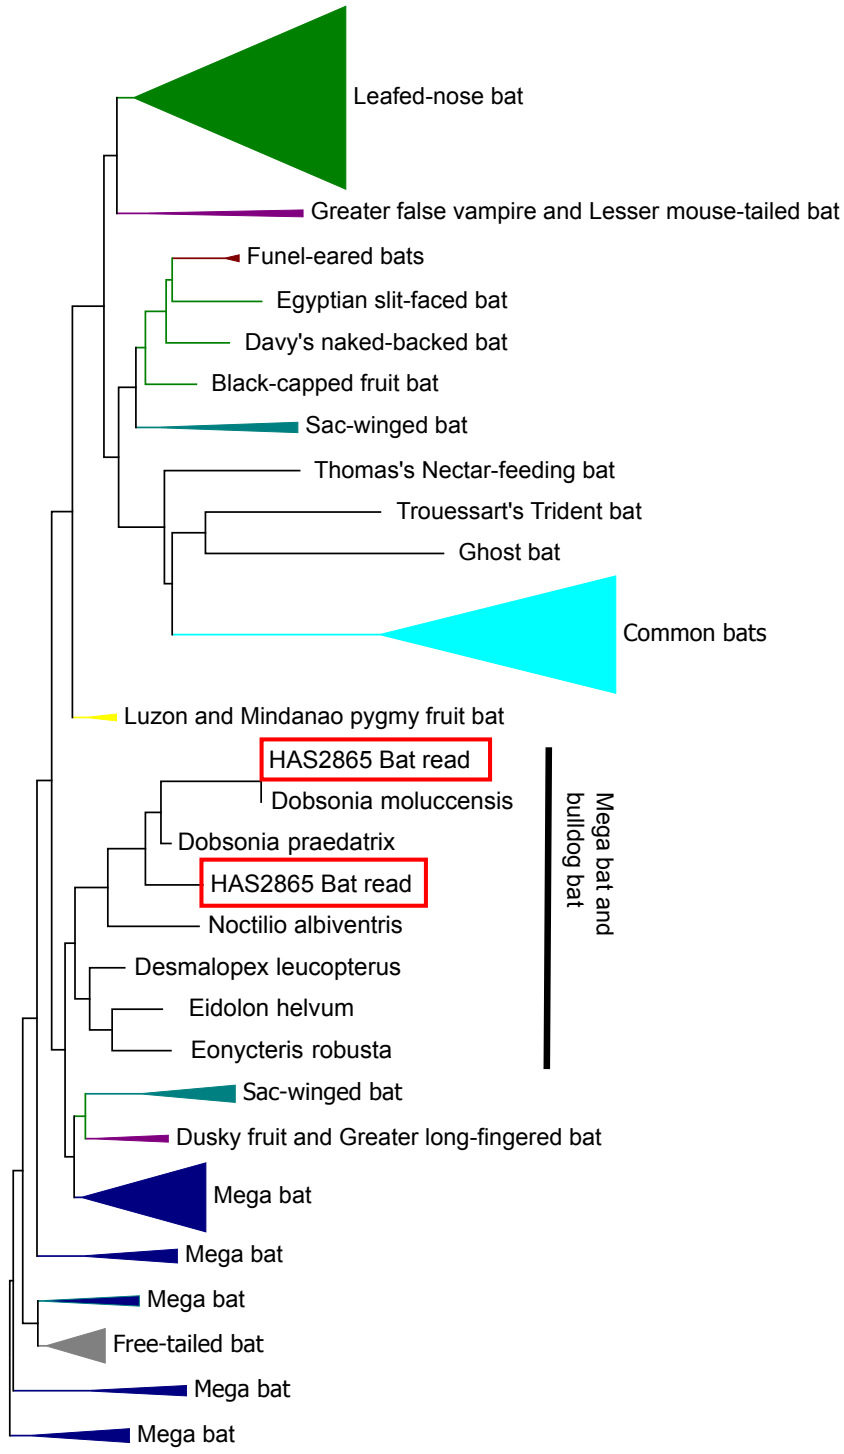

0.05
